# Supplementary material for: On the Interactions of Melatonin/β-Cyclodextrin Inclusion Complex: A Novel Approach Combining Efficient Semiempirical Extended Tight-Binding (xTB) Results with Ab Initio Methods
Source: MDPI journal article supplement (doi:10.3390/molecules26195881), 2021-09-28
Supplement: s1 [file s1]

# On the Interactions of Melatonin/ $\beta$ -Cyclodextrin Inclusion Complex: A Novel Approach Combining Efficient Semiempirical Extended Tight-Binding (xTB) Results with Ab Initio Methods

Riccardo Ferrero <sup>1</sup>, Stefano Pantaleone <sup>1,2</sup>, Massimo Delle Piane <sup>3</sup>, Fabrizio Caldera <sup>1</sup>, Marta Corno <sup>1,\*</sup>, Francesco Trotta <sup>1</sup> and Valentina Brunella <sup>1,\*</sup>

- <sup>1</sup> Dipartimento di Chimica and Nanostructured Interfaces and Surfaces (NIS) Centre, Università degli Studi di Torino, via P. Giuria 7, IT-10125 Torino, Italy; riccardo.ferrero@unito.it (R.F.); stefano.pantaleone@unito.it (S.P.); fabrizio.caldera@unito.it (F.C.); francesco.trotta@unito.it (F.T.)
- <sup>2</sup> Dipartimento di Chimica, Biologia e Biotecnologie, Università degli Studi di Perugia, Via Elce di Sotto 8, I-06123 Perugia, Italy
- <sup>3</sup> Politecnico di Torino, Department of Applied Science and Technology (DISAT), Corso Duca degli Abruzzi, 24, 10129 Torino, Italy; massimo.dellepiane@polito.it (M.D.P.)
- \* Correspondence: marta.corno@unito.it (M.C.); valentina.brunella@unito.it (V.B.)

**Table S1.** CCSD(T) vs GFN2 ranking of the 52 melatonin conformers. In yellow the 15 structures used for the benchmark.

| CCSD(T) | GFN2 |
|---------|------|
| 0       | 10   |
| 1       | 11   |
| 2       | 7    |
| 3       | 4    |
| 4       | 15   |
| 5       | 5    |
| 6       | 0    |
| 7       | 6    |
| 8       | 9    |
| 9       | 2    |
| 10      | 18   |
| 11      | 21   |
| 12      | 22   |
| 13      | 1    |
| 14      | 3    |
| 15      | 19   |
| 16      | 8    |
| 17      | 12   |
| 18      | 14   |
| 19      | 26   |
| 20      | 31   |
| 21      | 32   |
| 22      | 13   |
| 23      | 29   |
| 24      | 36   |

|    |    |
|----|----|
| 25 | 27 |
| 26 | 20 |
| 27 | 23 |
| 28 | 25 |
| 29 | 30 |
| 30 | 40 |
| 31 | 39 |
| 32 | 35 |
| 33 | 33 |
| 34 | 37 |
| 35 | 43 |
| 36 | 42 |
| 37 | 17 |
| 38 | 34 |
| 39 | 24 |
| 40 | 28 |
| 41 | 16 |
| 42 | 46 |
| 43 | 38 |
| 44 | 41 |
| 45 | 45 |
| 46 | 44 |
| 47 | 47 |
| 48 | 49 |
| 49 | 48 |
| 50 | 50 |
| 51 | 51 |

---

**Table S2.** Complexation energy ( $\Delta E$ ), enthalpy ( $\Delta H$ ), and free energy ( $\Delta G$ ). Values are in kcal/mol. Legend: MT = melatonin,  $\beta$ CD =  $\beta$ -cyclodextrin, GP = gas phase, W = water, ACN = acetonitrile.

| Method      | Structure       | $\Delta E$ | $\Delta H$ | $\Delta G$ |
|-------------|-----------------|------------|------------|------------|
| PBEh-3c     | EXT             | -39.4      | -38.5      | -18.2      |
|             | EXT             | -30.3      | -28.7      | -11.0      |
| GFNFF - GP  | MT- $\beta$ CD1 | -44.3      | -39.9      | -21.2      |
|             | MT- $\beta$ CD2 | -41.2      | -38.0      | -19.2      |
|             | MT- $\beta$ CD3 | -40.6      | -36.3      | -16.7      |
|             | EXT             | -39.4      | -35.8      | -17.2      |
| GFNF - W    | MT- $\beta$ CD1 | -27.1      | -23.5      | -5.7       |
|             | MT- $\beta$ CD2 | -26.9      | -23.6      | -5.5       |
|             | MT- $\beta$ CD3 | -24.4      | -21.1      | -3.8       |
|             | EXT             | -24.8      | -21.8      | -4.4       |
| GFNFF - ACN | MT- $\beta$ CD1 | -32.3      | -26.9      | -6.4       |
|             | MT- $\beta$ CD2 | -19.5      | -16.0      | 2.9        |
|             | MT- $\beta$ CD3 | -12.4      | -9.9       | 7.4        |

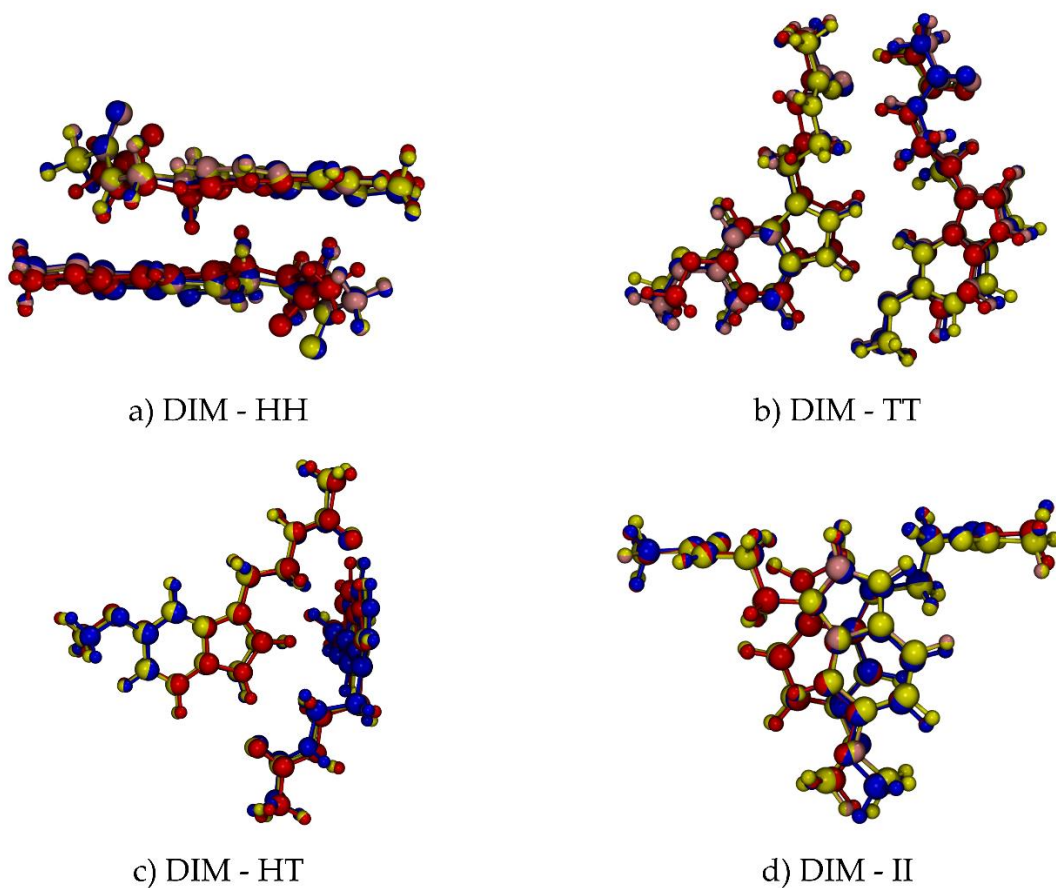

**Figure S1.** Superimposed optimized structures of melatonin dimer. Colors legend: GFN2 blue, GFNFF red, PBEh-3c yellow, B3LYP pink.

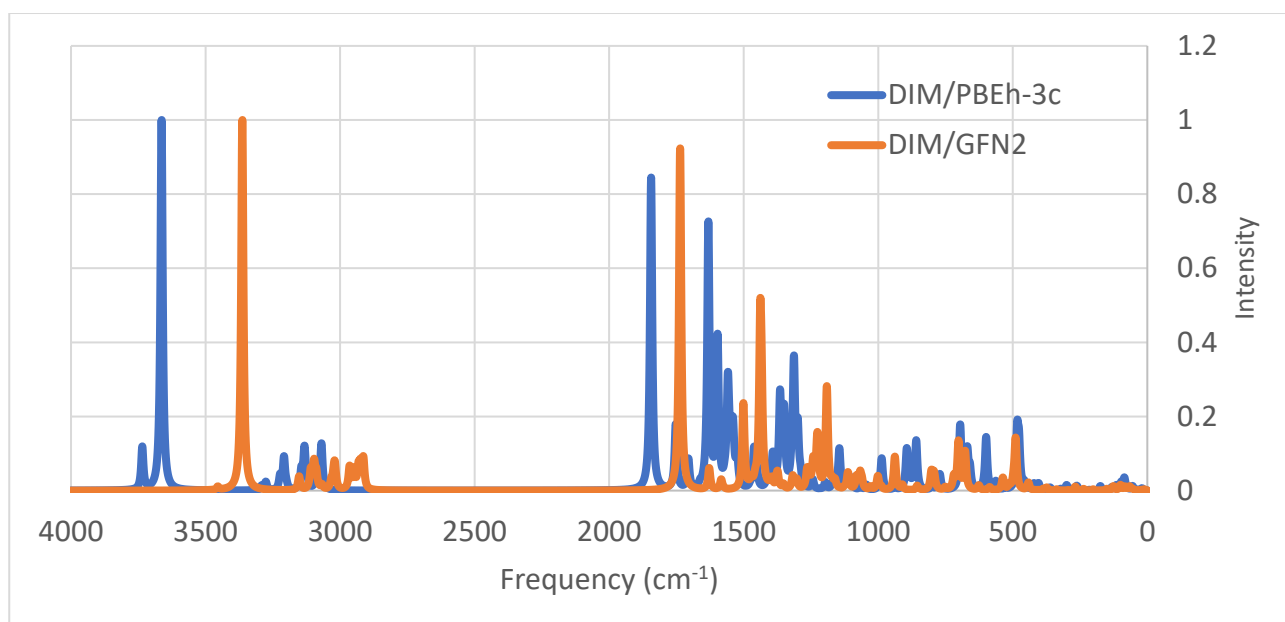

**Figure S2.** Computed spectra for the Indole-Indole dimer at PBEh-3c (blue line) and GFN2 (orange line).

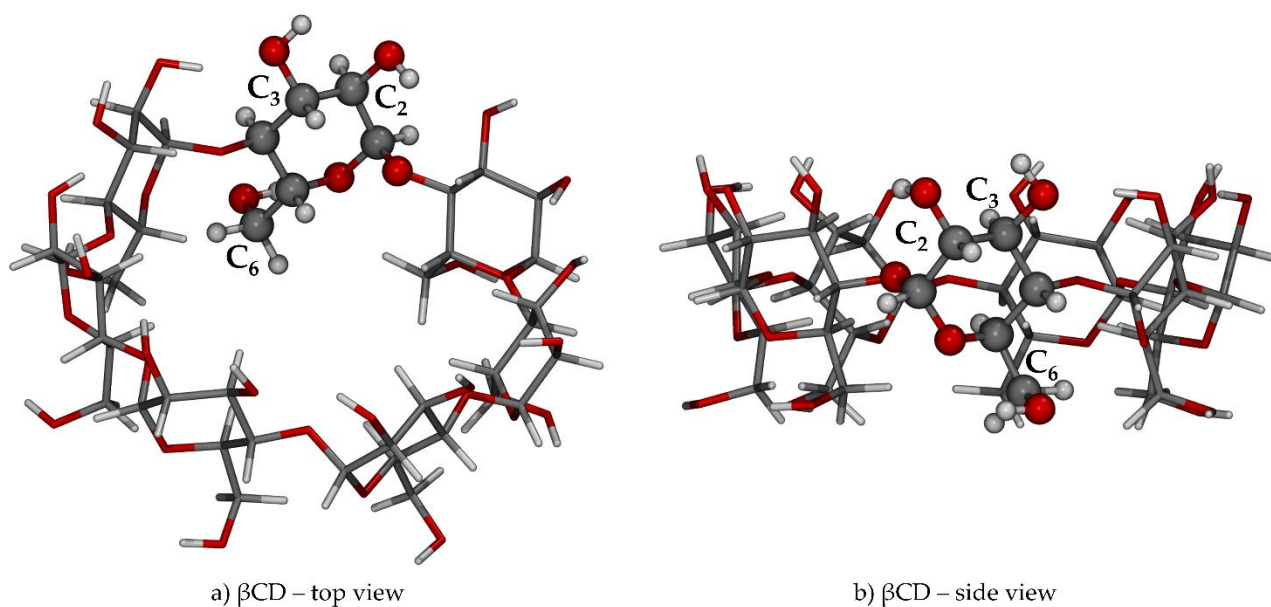

**Figure S3.** Top and side view of  $\beta$ CD. The symmetry irreducible atoms are in ball and stick. Atom color: H white, C grey, O red.

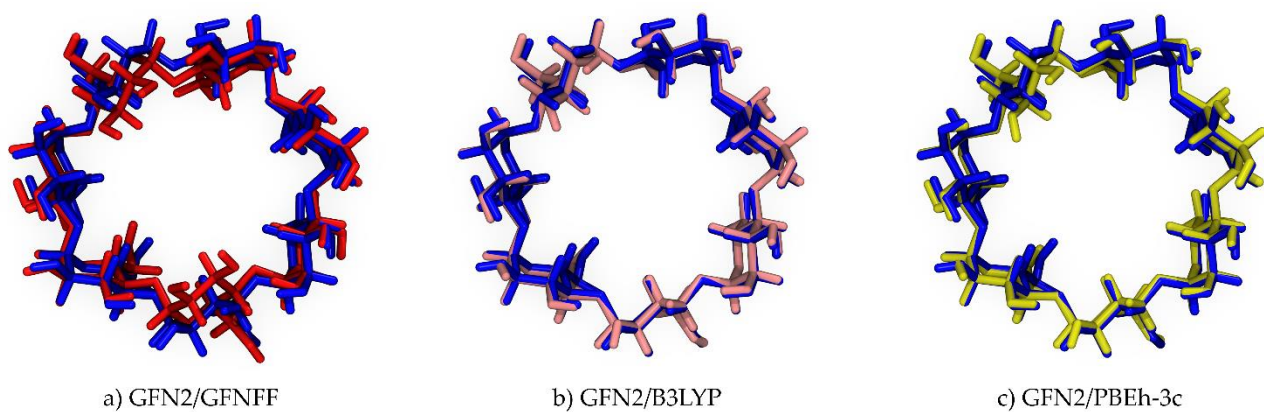

**Figure S4.** Superimposed optimized structures of  $\beta$ -cyclodextrin. Colors legend: GFN2 blue, GFNFF red, PBEh-3c yellow, B3LYP pink.

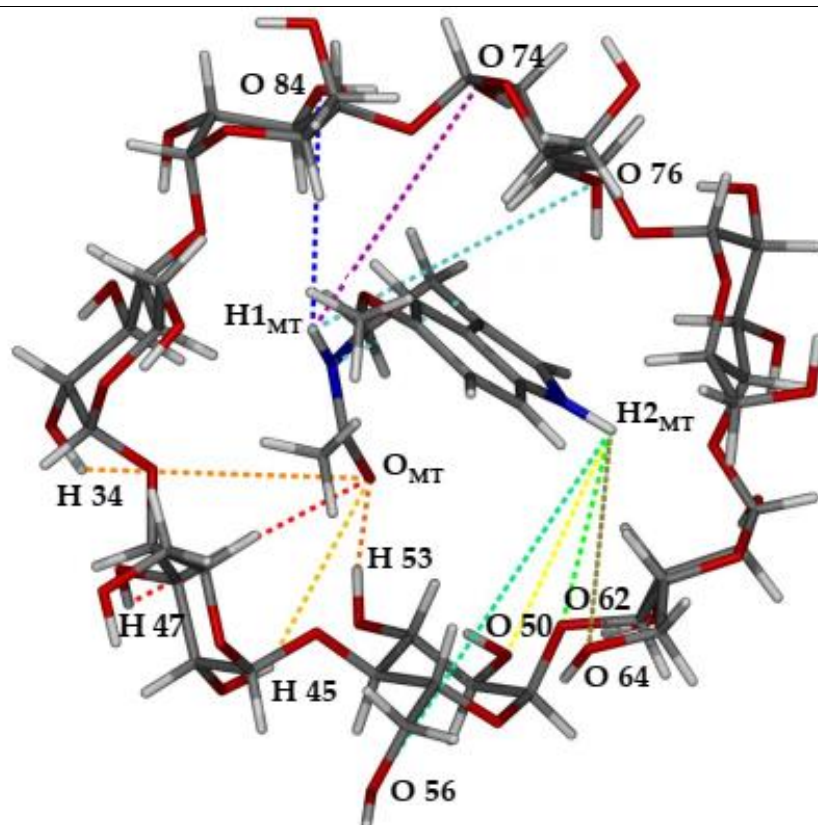

a) Starting point

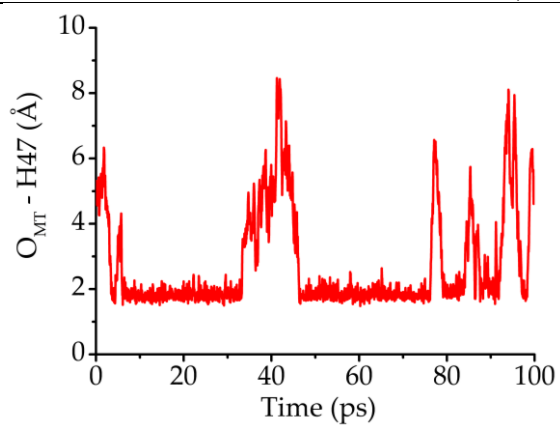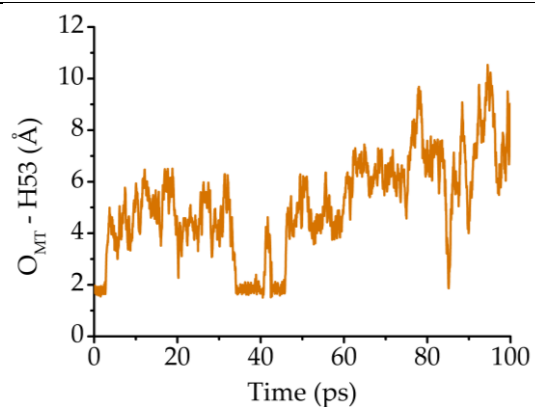

b) H47

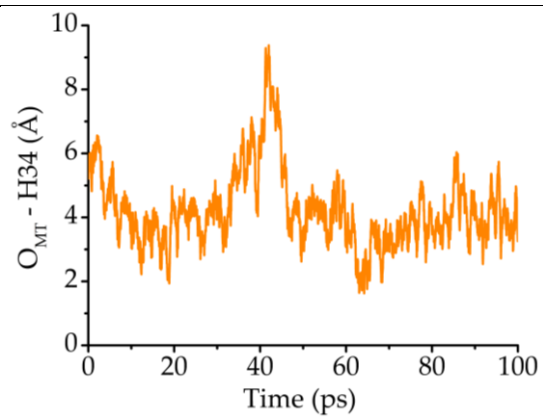

c) H53

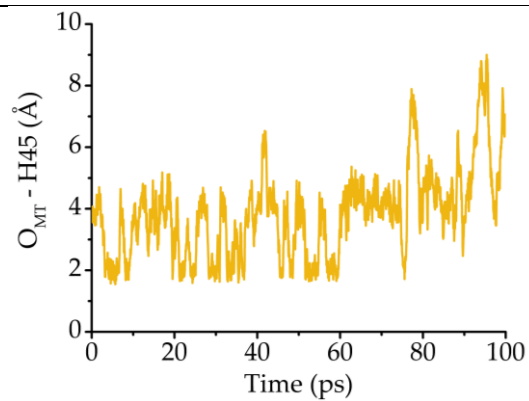

d) H34

e) H45

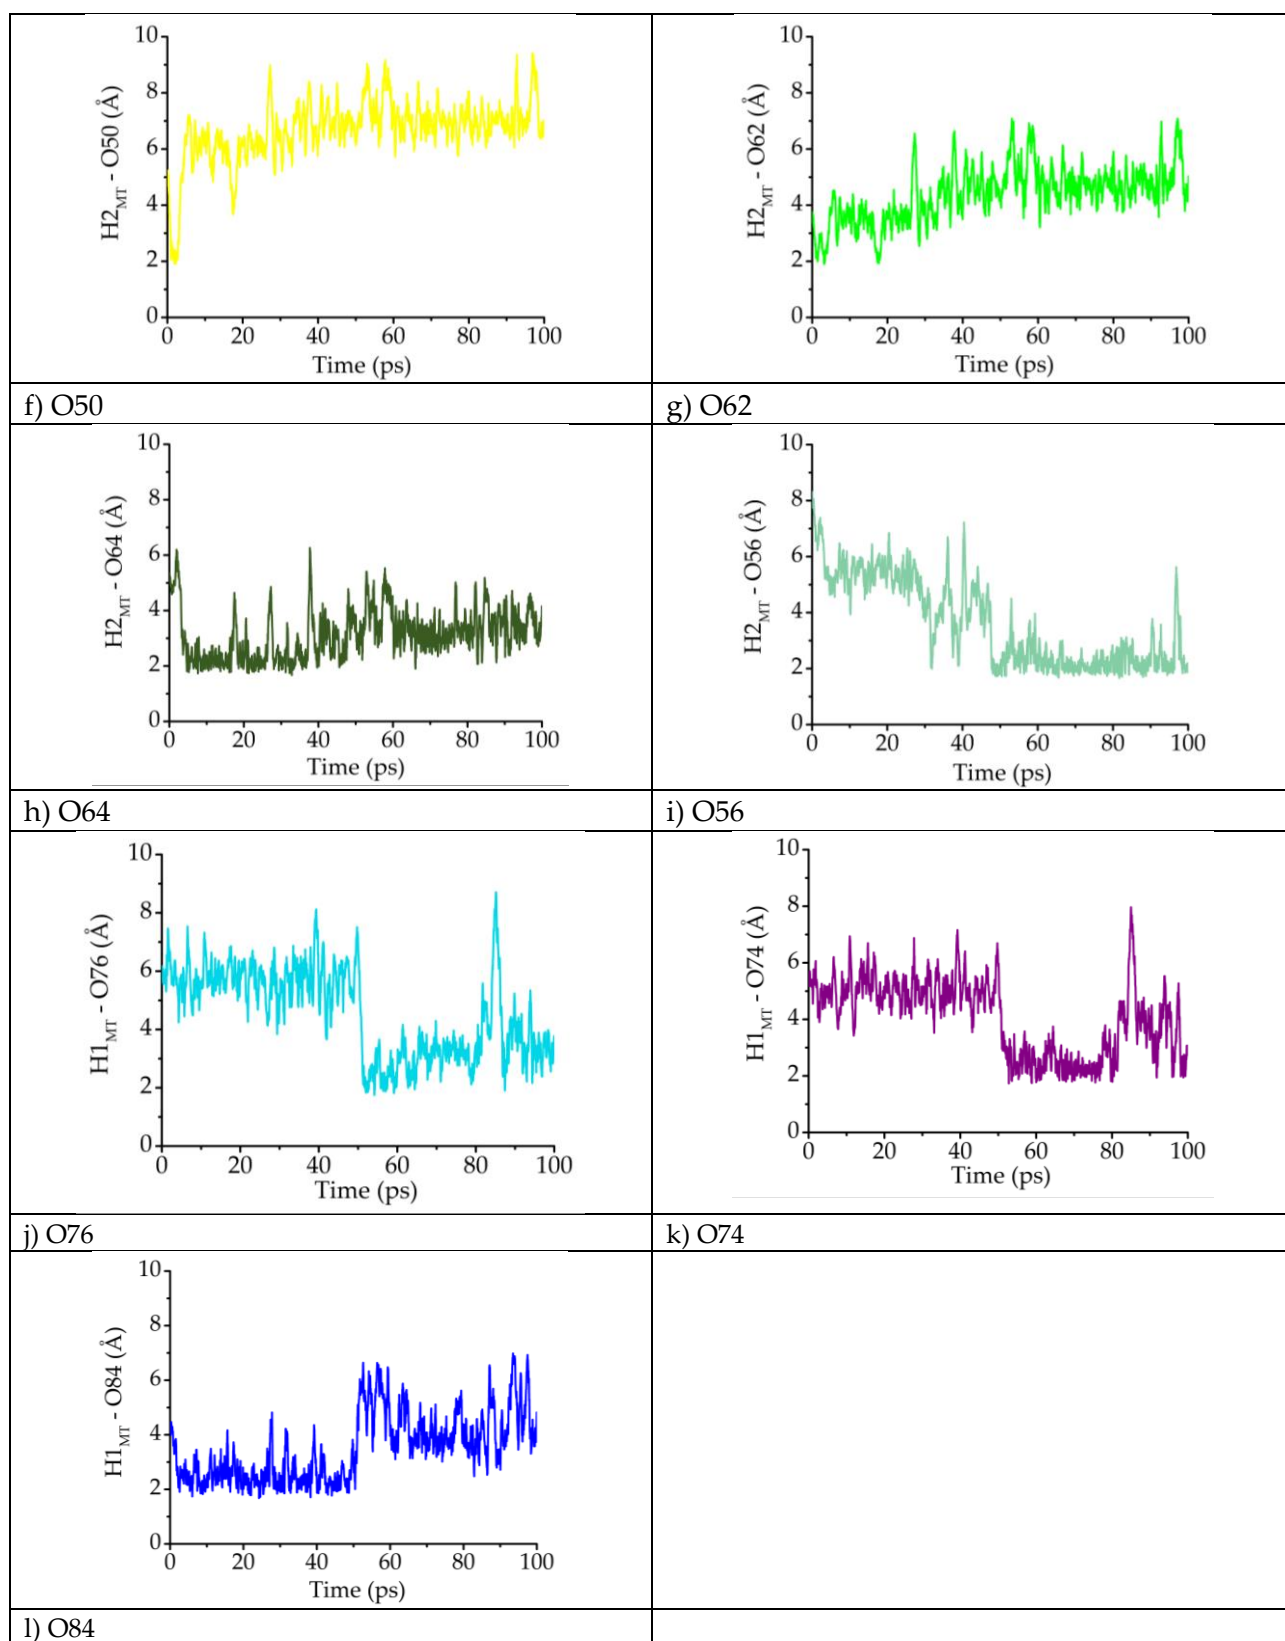

**Figure S5.** H bond evolution during the molecular dynamic simulation on the MT/ $\beta$ CD complex.



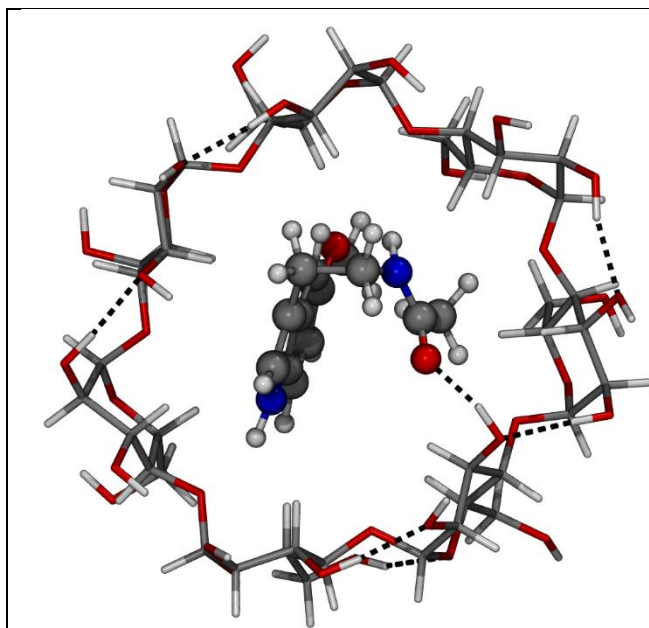

a) 0 ps - top

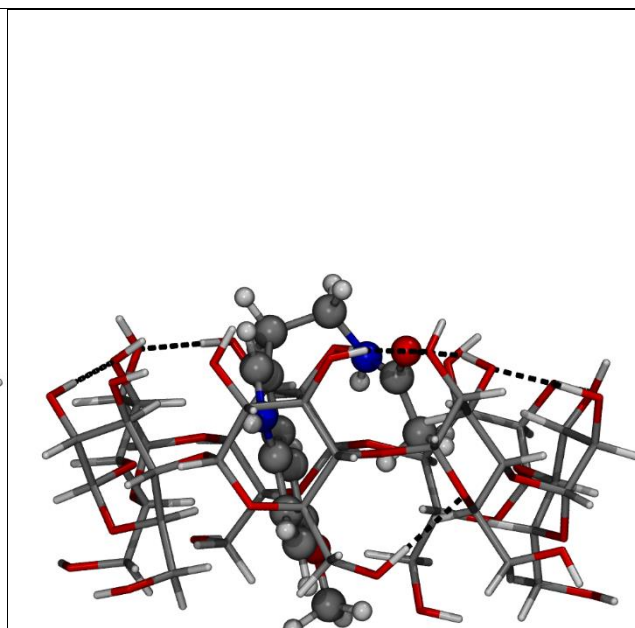

b) 0 ps - side

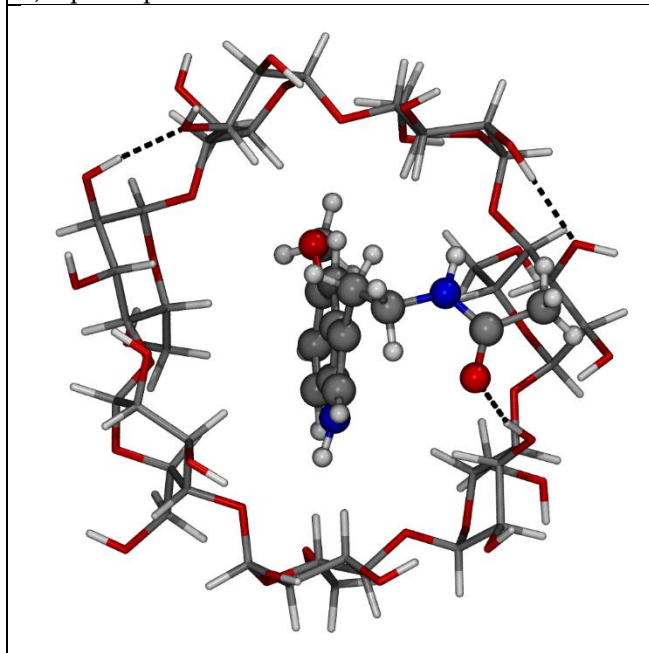

c) 10 ps -top

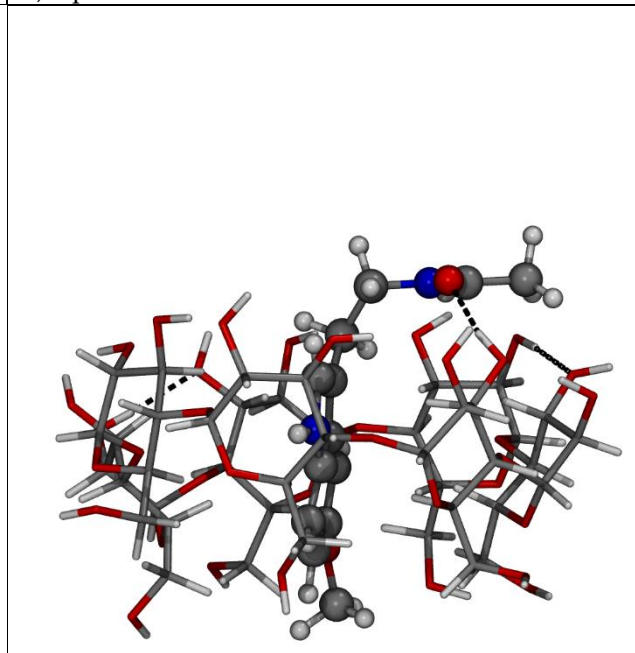

d) 10 ps -side



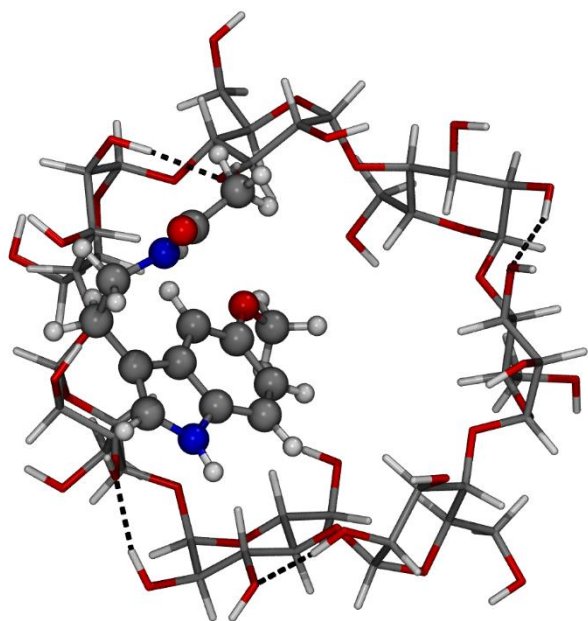

e) 25 ps – top

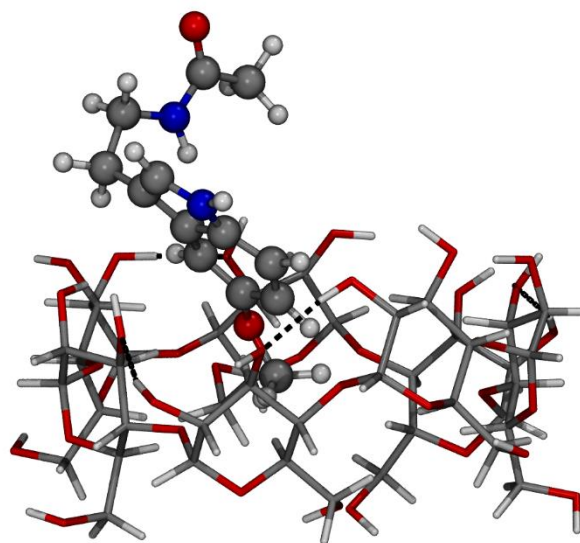

f) 25 ps - side

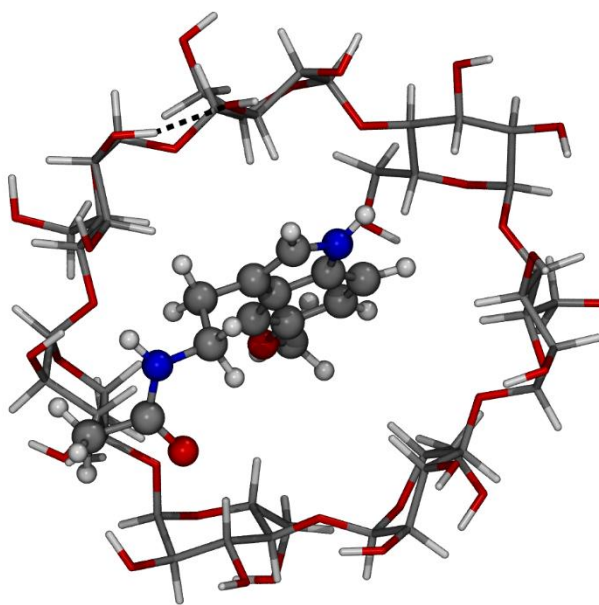

g) 50 ps – top

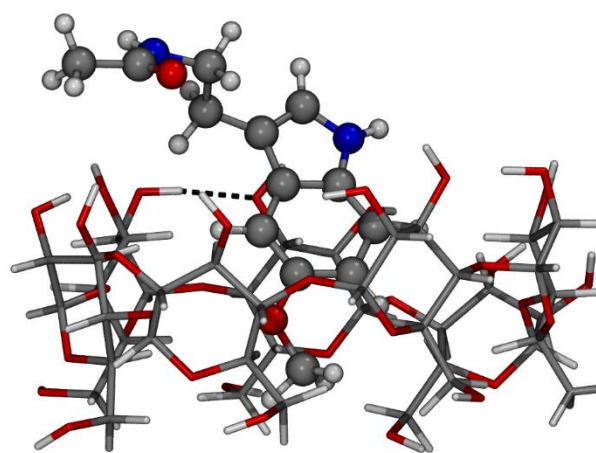

h) 50 ps – side

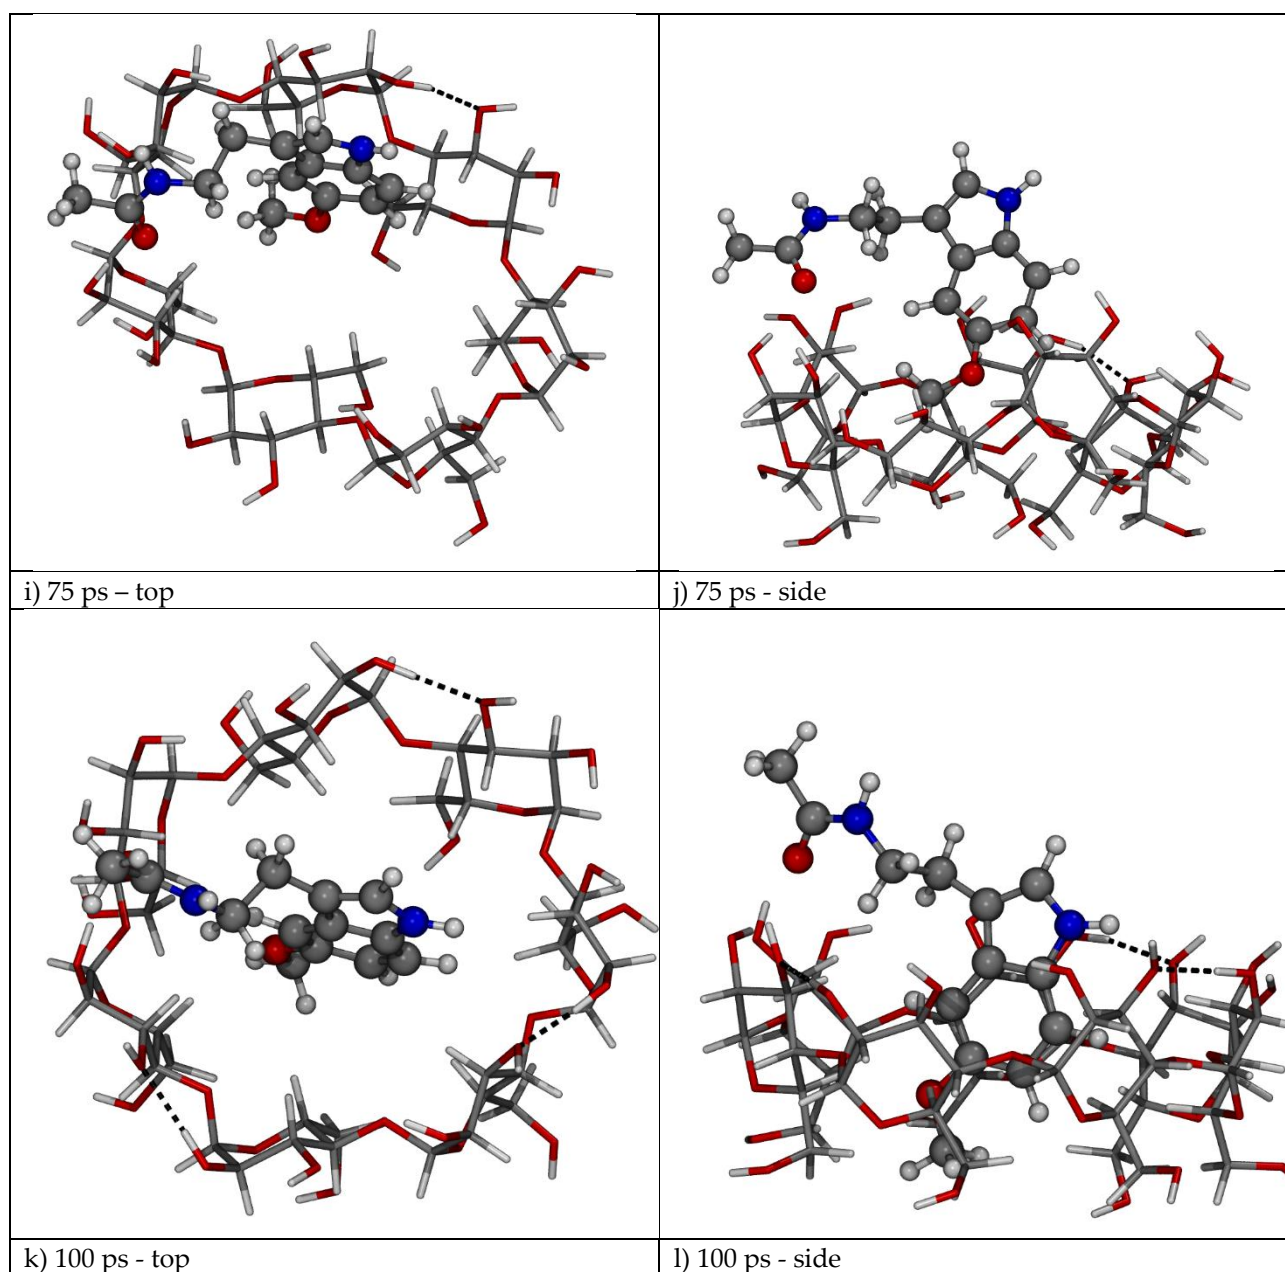

**Figure S6.** Selected snapshots of the molecular dynamic simulation in implicit water solvation of the MT/βCD complex.

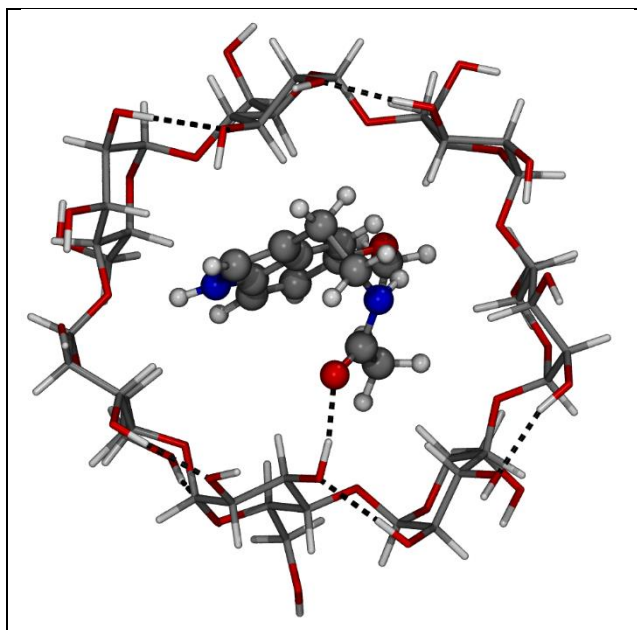

a) 0 - top

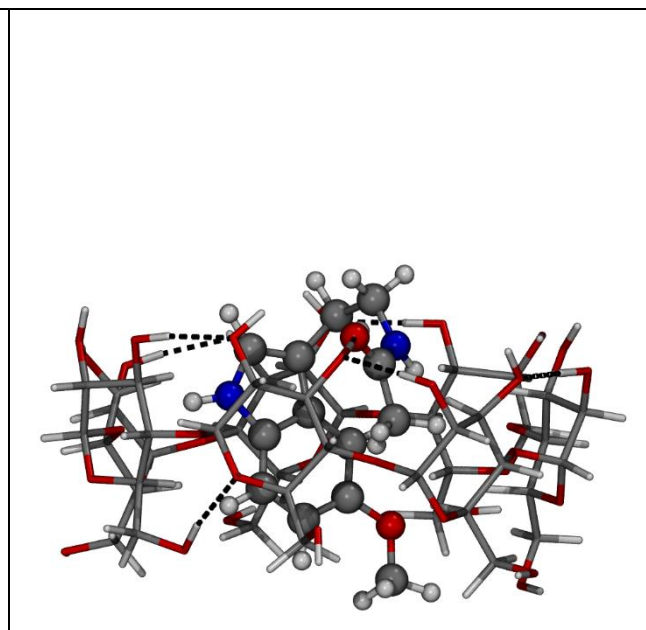

b) 0 - side

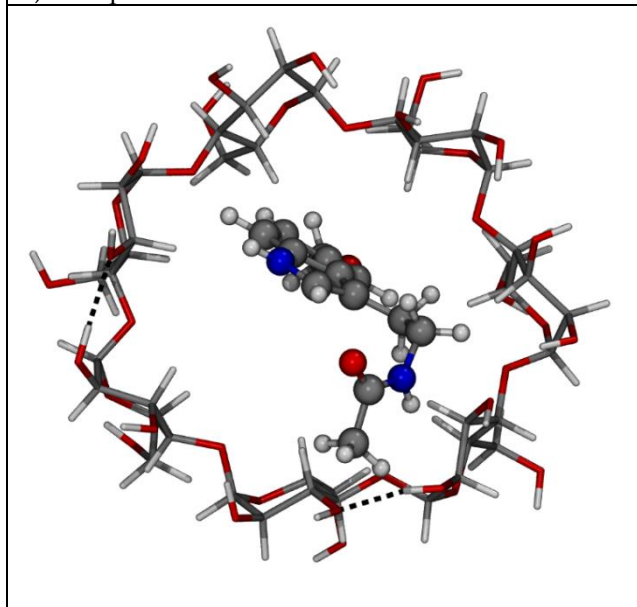

c) 10 ps - top

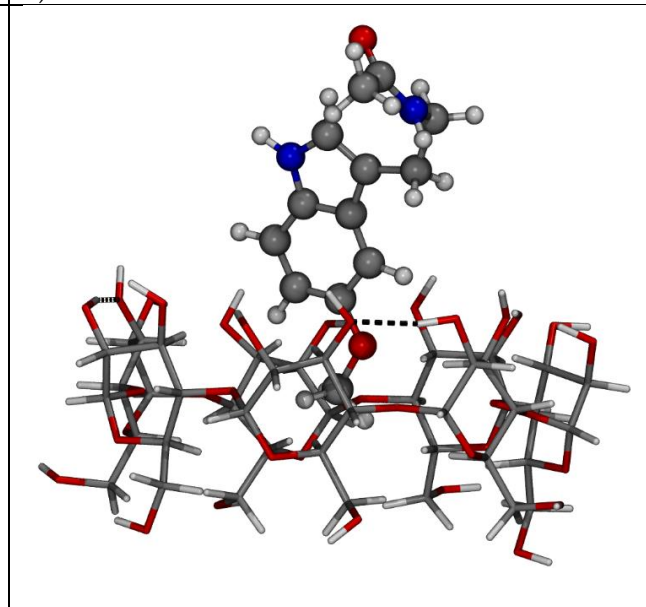

d) 10 ps - side

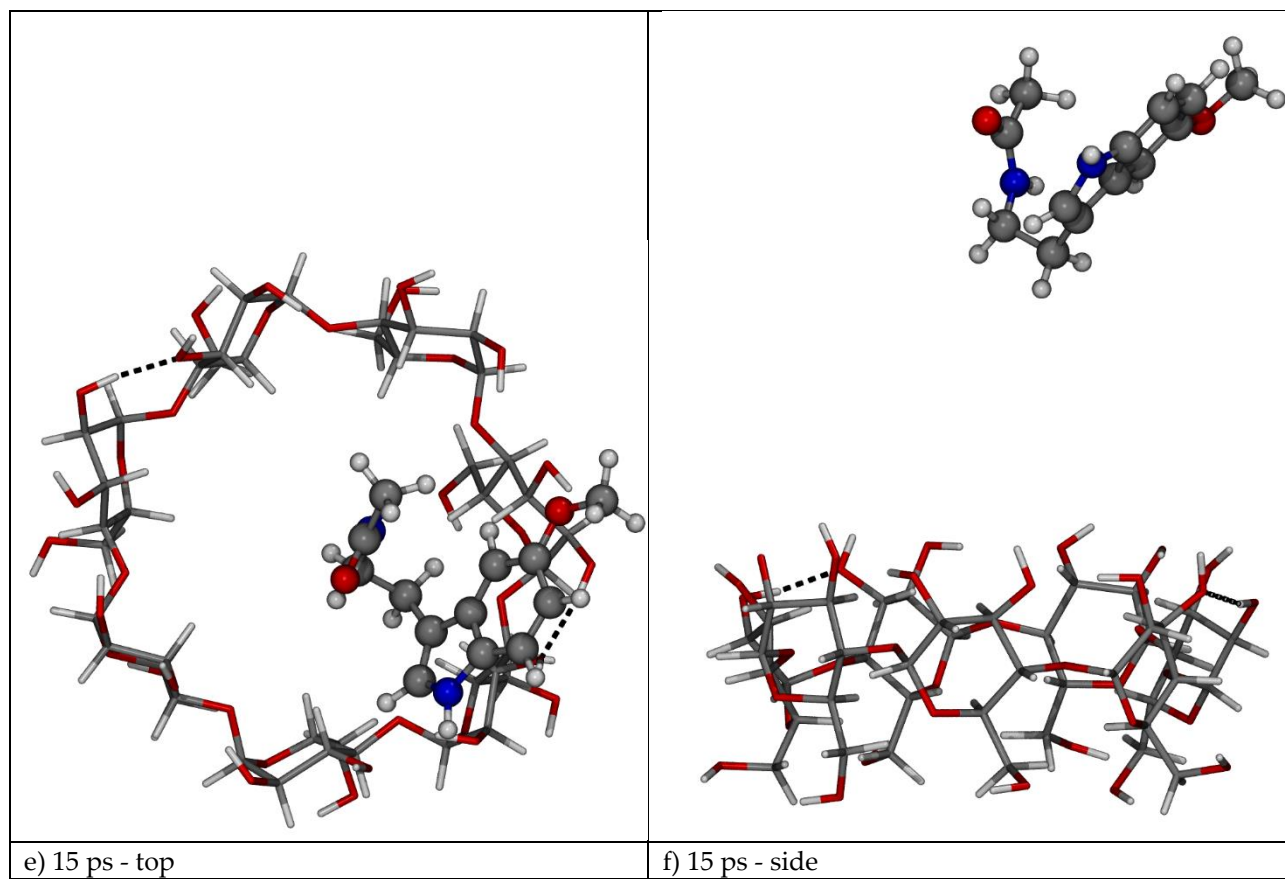

**Figure S7.** Selected snapshots of the molecular dynamic simulation in implicit acetonitrile solvation of the MT/ $\beta$ CD complex.
